# Supplementary material for: Highly-efficient solid-state emissions of anthracene–o-carborane dyads with various substituents and their thermochromic luminescence properties
Source: Royal Society of Chemistry journal article supplement (doi:10.1039/c7tc02682j), 2017-01-01
Supplement: c7tc02682j1.pdf [file c7tc02682j1.pdf]

## Supporting Information

### Highly-Efficient Solid-State Emissions of the Anthracene-*o*-Carborane Dyads with Various Substituents and Their Thermochromic Luminescent Properties

Hirofumi Naito<sup>1</sup>, Kenta Nishino<sup>1</sup>, Yasuhiro Morisaki<sup>1,2</sup>, Kazuo Tanaka<sup>1</sup>, and Yoshiki

Chujo<sup>1\*</sup>

<sup>1</sup>*Department of Polymer Chemistry, Graduate School of Engineering, Kyoto University, Katsura, Nishikyo-ku, Kyoto 615-8510, Japan*

<sup>2</sup>*Present address: Department of Applied Chemistry for Environment, School of Science and Technology, Kwansei Gakuin University, 2-1 Gakuen, Sanda, Hyogo 669-1337, Japan*

\*E-mail: [chujo@chujo.synchem.kyoto-u.ac.jp](mailto:chujo@chujo.synchem.kyoto-u.ac.jp)

## Experimental

**General.**  $^1\text{H}$ ,  $^{13}\text{C}$ , and  $^{11}\text{B}$  NMR spectra were recorded on a JEOL JNM-EX400 instrument at 400, 100, and 128 MHz, respectively. The  $^1\text{H}$  and  $^{13}\text{C}$  chemical shift values were expressed relative to  $\text{Me}_4\text{Si}$  as an internal standard. The  $^{11}\text{B}$  chemical shift values were expressed relative to  $\text{BF}_3\cdot\text{Et}_2\text{O}$  as an external standard. High-resolution mass spectra (HRMS) were obtained on a Thermo Fisher Scientific EXACTIVE spectrometer for atmospheric pressure chemical ionization (APCI). Analytical thin-layer chromatography (TLC) was performed with silica gel 60 Merck F254 plates. Column chromatography was performed with Wakogel C-300 silica gel. UV-vis absorption spectra were obtained on a SHIMADZU UV3600 spectrophotometer. Photoluminescence (PL) spectra were obtained on a Horiba FluoroMax-4 luminescence spectrometer; absolute PL quantum efficiencies ( $\Phi_{\text{PL}}$ ) were determined using a Horiba FL-3018 Integrating Sphere. Fluorescence lifetime measurement was performed on a Horiba FluoreCube spectrofluorometer system; excitation was carried out using a UV diode laser (NanoLED 375 nm). Variable temperature solid-state PL spectra were obtained on an Ocean Optics USB 4000 and recorded on a Cimarec<sup>TM</sup> Digital Stirring Hotplate. Cyclic voltammetry (CV) was carried out on a BAS CV-50W electrochemical analyzer in DMF containing 0.1 M of sample and 0.1 M of  $\text{Bu}_4\text{NClO}_4$  with a glassy carbon working electrode, a Pt counter electrode, a Ag/AgCl (Ag/Ag<sup>+</sup>) reference electrode, and a ferrocene/ferrocenium external reference. X-Ray diffraction (XRD) data were obtained on a Rigaku MiniFlex diffractometer using  $\text{CuK}\alpha$  radiation in a range of  $2\leq 2\theta\leq 50^\circ$  at intervals of  $0.01^\circ$  at a scanning rate of  $0.25^\circ\text{ min}^{-1}$ .

**Materials.** All synthetic procedures were performed under Ar atmosphere. Diethyl ether ( $\text{Et}_2\text{O}$ ) and tetrahydrofuran (THF) were purified by passage through purification column under Ar pressure. 1,2-Dimethoxyethane (DME) and diisopropylamine (*i*-Pr<sub>2</sub>NH) were

purified by distillation under Ar pressure. *n*-BuLi in hexane, CuCl, pyridine, Pd(PPh<sub>3</sub>)<sub>2</sub>Cl<sub>2</sub>, CuI, ethynylbenzene, decaborane (B<sub>10</sub>H<sub>14</sub>), AgNO<sub>3</sub>, acetonitrile (MeCN), toluene, iodomethane (MeI), and trimethylsilyl chloride (TMSCl) were obtained commercially and used without purification. 9-(Phenylethynyl)anthracene and 1-(9-anthracenyl)-*o*-carborane (**1**) were synthesized and characterized according to the literature.<sup>1</sup> Poly(methyl methacrylate) (PMMA, *M<sub>n</sub>* = 800,000) was purchased from Nacalai Tesque and used without purification.

### Synthetic procedures

**1-(9-Anthracenyl)-2-phenyl-*o*-carborane (ANT-Ph).** The mixture of 9-(phenylethynyl)anthracene (0.278 g, 1.00 mmol), decaborane (0.257 g, 2.10 mmol), and AgNO<sub>3</sub> (6.8 mg, 0.04 mmol) was dissolved in dry toluene (5 mL) at room temperature under Ar atmosphere. MeCN (0.63 mL, 2.0 mmol) was added, and the mixture was refluxed for 3 d. After cooling to room temperature, the solvent was separated from the solid and evaporated. The residue was subjected to silica gel column chromatography with hexane as an eluent (*R<sub>f</sub>* = 0.21). Recrystallization from CHCl<sub>3</sub>/MeOH to afford **ANT-Ph** as an orange crystal (0.11 mg, 0.28 mmol, 28%). <sup>1</sup>H NMR (400 MHz, CD<sub>2</sub>Cl<sub>2</sub>): δ (ppm) 9.02 (2H, d, *J* = 9.0 Hz, Ar-*H*), 8.09 (1H, s, Ar-*H*), 7.74 (2H, d, *J* = 8.3 Hz, Ar-*H*), 7.52–7.50 (2H, m, Ar-*H*), 7.41–7.32 (2H, m, Ar-*H*), 6.93–6.89 (2H, m, Ar-*H*), 6.58–6.56 (2H, m, Ar-*H*), 4.60–1.56 (10H, br, B-*H*). <sup>13</sup>C NMR (100 MHz, CD<sub>2</sub>Cl<sub>2</sub>): δ (ppm) 134.0, 133.3, 131.8, 130.6, 130.2, 128.6, 127.6, 126.9, 126.1, 125.1, 119.0, 95.7, 91.8. <sup>11</sup>B NMR (128 MHz, CD<sub>2</sub>Cl<sub>2</sub>): δ (ppm) 0.5, -0.7, -2.2, -3.3, -8.5, -9.7, -10.8. HRMS (APCI): Calcd. for C<sub>22</sub>H<sub>24</sub>B<sub>10</sub> [M+H]<sup>+</sup> *m/z* 399.2881, found *m/z* 399.2879.

**1-(9-Anthracenyl)-2-methyl-*o*-carborane (ANT-Me).** To a solution of **ANT-H** (64.1 mg, 200  $\mu$ mol) in 1.60 mL of Et<sub>2</sub>O was added dropwise a 1.60 M solution of *n*-BuLi in hexane (125  $\mu$ L, 200  $\mu$ mol) at 0 °C under Ar atmosphere. The mixture was stirred for 1 h, and then MeI (40  $\mu$ L, 640  $\mu$ mol) was added. The mixture was stirred at room temperature for 4 h in the dark. The reaction mixture was washed with water and brine, and the organic layer was dried over MgSO<sub>4</sub>. After MgSO<sub>4</sub> was removed, the solvent was evaporated. The residue was purified by HPLC with CHCl<sub>3</sub> as an eluent and recrystallized from CHCl<sub>3</sub>/hexane to afford **ANT-Me** as a yellow crystal (25.5 mg, 76.2  $\mu$ mol, 38%). <sup>1</sup>H NMR (400 MHz, CD<sub>2</sub>Cl<sub>2</sub>):  $\delta$ (ppm) 9.09 (2H, d, *J* = 9.3 Hz, Ar-*H*), 8.55 (1H, s, Ar-*H*), 8.00 (2H, t, *J* = 4.6 Hz, Ar-*H*), 7.56–7.46 (4H, m, Ar-*H*), 4.13–1.08 (10H, br, B-*H*), 0.68 (3H, s, CH<sub>3</sub>). <sup>13</sup>C NMR (100 MHz, CD<sub>2</sub>Cl<sub>2</sub>):  $\delta$ (ppm) 134.1, 133.7, 132.3, 129.0, 127.5, 126.2, 125.4, 119.1, 87.5, 85.6, 22.9. <sup>11</sup>B NMR (128 MHz, CD<sub>2</sub>Cl<sub>2</sub>):  $\delta$ (ppm) –0.3, –1.5, –4.5, –5.7, –6.6, –8.5, –9.7, –10.8. HRMS (APCI): Calcd. for C<sub>17</sub>H<sub>22</sub>B<sub>10</sub> [M+H]<sup>+</sup> *m/z* 337.2725, found *m/z* 337.2718.

**1-(9-Anthracenyl)-2-trimethylsilyl-*o*-carborane (ANT-TMS).** To a solution of **ANT-H** (56.1 mg, 175  $\mu$ mol) in 1.8 mL of Et<sub>2</sub>O was added dropwise a 1.58 M solution of *n*-BuLi in hexane (111  $\mu$ L, 175  $\mu$ mol) at 0 °C under Ar atmosphere. The mixture was stirred for 1 h, and then TMSCl (55  $\mu$ L, 435  $\mu$ mol) was added, and the mixture was stirred at room temperature for 4 h. The reaction mixture was washed with water and brine, and the organic layer was dried over MgSO<sub>4</sub>. After MgSO<sub>4</sub> was removed, the solvent was evaporated. The residue was purified by HPLC with CHCl<sub>3</sub> as an eluent to afford **ANT-TMS** as an orange solid (44.5 mg, 113  $\mu$ mol, 65%). Single crystals for crystallographic study were obtained by slow evaporation of CHCl<sub>3</sub>/hexane solution. <sup>1</sup>H NMR (400 MHz, CD<sub>2</sub>Cl<sub>2</sub>):  $\delta$ (ppm) 9.20 (2H, d, *J* = 9.3 Hz, Ar-*H*), 8.55 (1H, s, Ar-*H*), 7.96 (2H, dd, *J* = 8.3, 0.7 Hz, Ar-*H*), 7.58–7.53 (2H, m, Ar-*H*), 7.48 (2H, t, *J* = 7.4 Hz, Ar-*H*), 4.37–1.29

(10H, br, B-*H*),  $-0.87$  (9H, s, Si-*CH*<sub>3</sub>). <sup>13</sup>C NMR (100 MHz, CD<sub>2</sub>Cl<sub>2</sub>):  $\delta$  (ppm) 134.3, 133.8, 132.4, 129.0, 127.1, 126.4, 125.4, 120.6, 88.8, 88.5,  $-1.4$ . <sup>11</sup>B NMR (128 MHz, CD<sub>2</sub>Cl<sub>2</sub>):  $\delta$  (ppm) 1.0, 0.5,  $-0.1$ ,  $-6.9$ ,  $-8.0$ ,  $-9.1$ ,  $-10.3$ . HRMS (APCI): Calcd. for C<sub>19</sub>H<sub>28</sub>B<sub>10</sub>Si [M+H]<sup>+</sup>  $m/z$  395.2964, found  $m/z$  395.2958.

### **Preparation of PMMA dispersion film**

PMMA ( $M_n = 800,000$ , 30 mg) and the dyads (3 mg) were dissolved in CHCl<sub>3</sub> (1 mL), and dispersed film was fabricated via drop casting.

### **Computational methods**

All computations were carried out with the Gaussian 09 suit program.<sup>2</sup> The molecular geometries were investigated by DFT and time-dependent DFT (TD-DFT) calculations with the B3LYP/6-31G(d) level of theory. Calculations on **ANT-H** with the CAM-B3LYP method (more appropriate for donor-acceptor system than the B3LYP method) or using 6-31+G(d) basis set gave similar results described here. The orbital contributions were generated by GaussSum package.<sup>3</sup>





**Chart 4.**  $^1\text{H}$  NMR spectrum of ANT-Me in  $\text{CD}_2\text{Cl}_2$ .

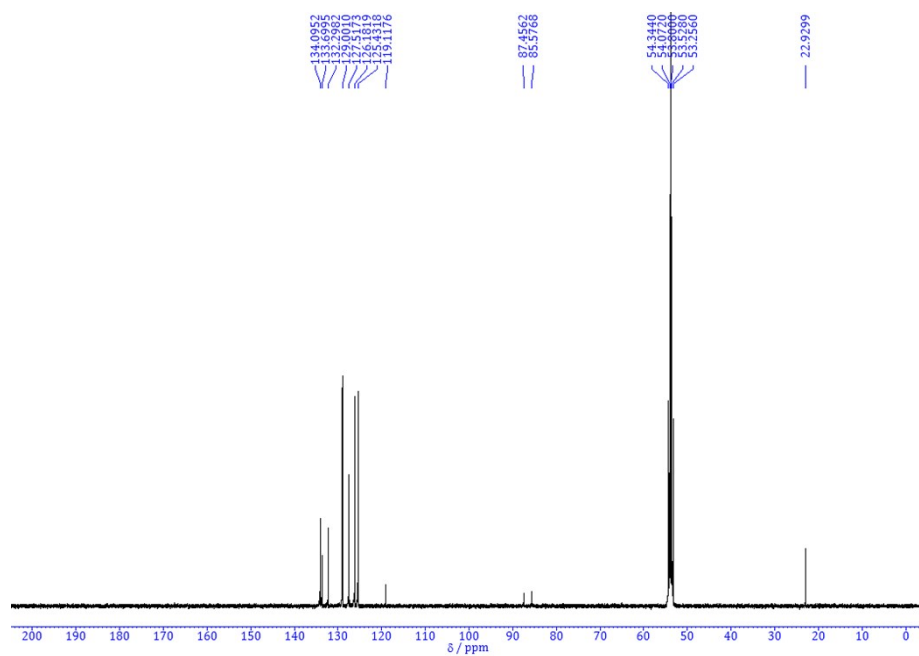

**Chart 5.**  $^{13}\text{C}$  NMR spectrum of ANT-Me in  $\text{CD}_2\text{Cl}_2$ .



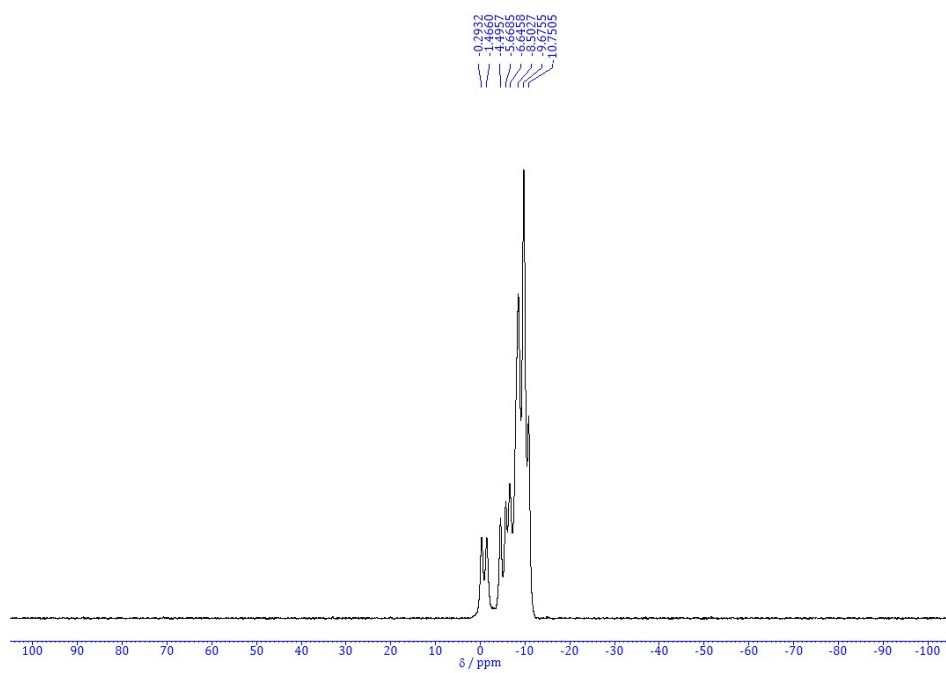

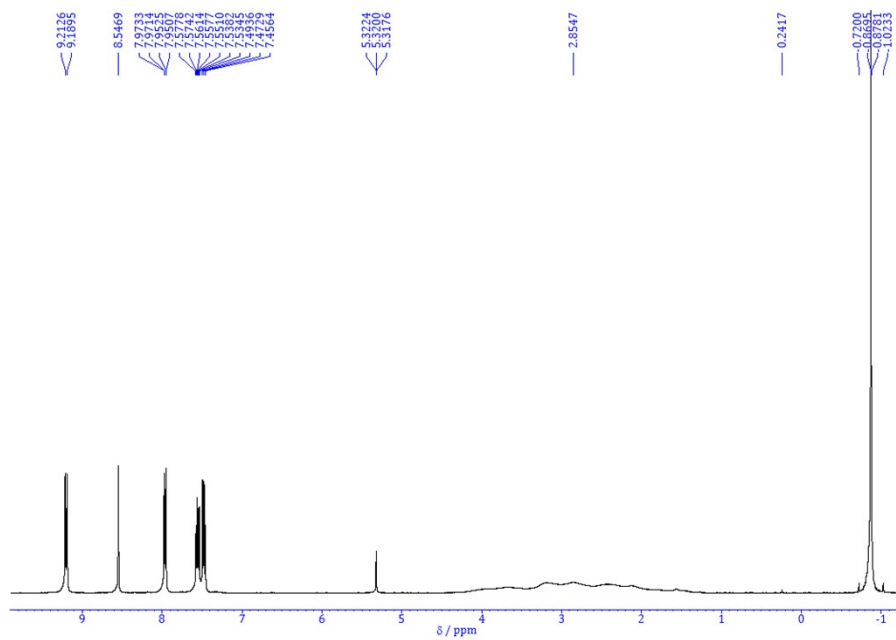

**Chart 8.**  $^{13}\text{C}$  NMR spectrum of ANT-TMS in  $\text{CD}_2\text{Cl}_2$ .

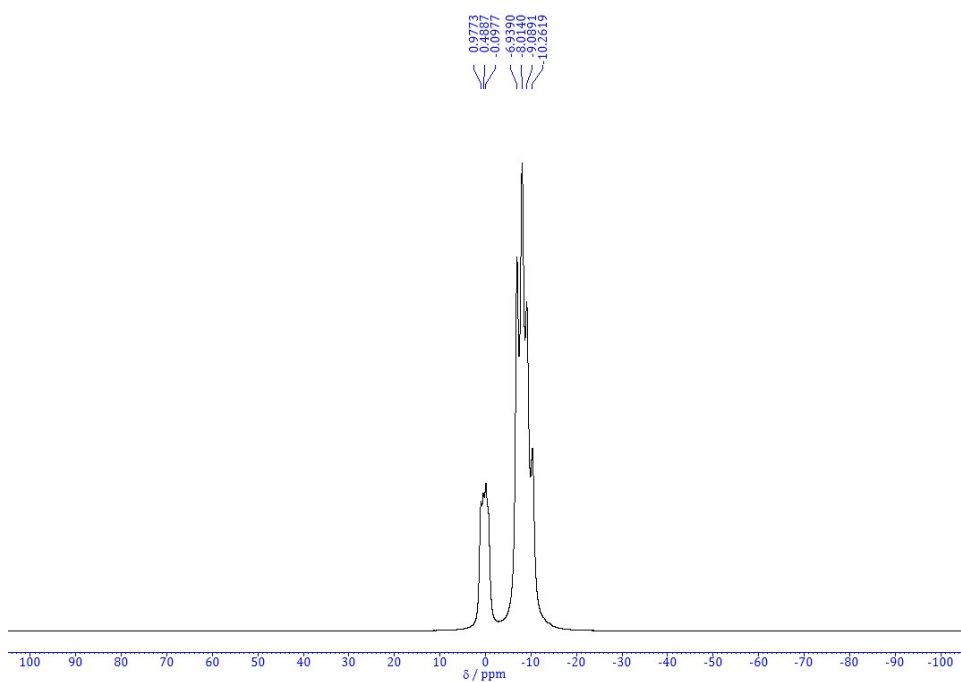

**Chart 9.**  $^{11}\text{B}$  NMR spectrum of ANT-TMS in  $\text{CD}_2\text{Cl}_2$ .

**Table S1.** Crystallographic data of ANT-Ph.<sup>a</sup>

|                                                     |                                                                                                                    |
|-----------------------------------------------------|--------------------------------------------------------------------------------------------------------------------|
| Empirical formula                                   | C <sub>22</sub> H <sub>24</sub> B <sub>10</sub>                                                                    |
| Formula weight                                      | 396.51                                                                                                             |
| Temperature (K)                                     | 93(2)                                                                                                              |
| Wavelength (Å)                                      | 0.71075                                                                                                            |
| Crystal system, space group                         | Monoclinic, <i>P</i> 2 <sub>1</sub> / <i>n</i>                                                                     |
| Unit cell dimensions                                | $a = 11.9314(8)$<br>$b = 12.5281(8)$<br>$c = 14.8597(11)$<br>$\alpha = 90$<br>$\beta = 99.122(7)$<br>$\gamma = 90$ |
| $V$ (Å <sup>3</sup> )                               | 2193.1(3)                                                                                                          |
| $Z$ , calculated density (Mg m <sup>-3</sup> )      | 4, 1.201                                                                                                           |
| Absorption coefficient                              | 0.061                                                                                                              |
| $F(000)$                                            | 824                                                                                                                |
| Crystal size (mm)                                   | 0.80 × 0.50 × 0.40                                                                                                 |
| $\theta$ range for data collection                  | 3.22–27.48                                                                                                         |
| Limiting indices                                    | $-15 \leq h \leq 15$ , $-14 \leq k \leq 16$ , $-19 \leq l \leq 19$                                                 |
| Reflections collected (unique)                      | 20669/5026 [ $R(\text{int}) = 0.0766$ ]                                                                            |
| Completeness to $\theta = 27.48$                    | 0.999                                                                                                              |
| Max. and min. transmission                          | 0.9760 and 0.9529                                                                                                  |
| Goodness-of-fit on $F^2$                            | 1.055                                                                                                              |
| Final $R$ indices [ $I > 2\sigma(I)$ ] <sup>a</sup> | $R_1 = 0.0563$ , $wR_2 = 0.1412$                                                                                   |
| $R$ indices (all data)                              | $R_1 = 0.0790$ , $wR_2 = 0.1552$                                                                                   |

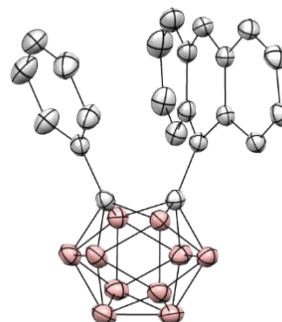

<sup>a</sup> The structures were solved by direct method (SIR97)<sup>4</sup> and refined by full-matrix least-squares procedures based on  $F^2$  (SHELX-97).<sup>5</sup>  $R_1 = \Sigma(|F_o| - |F_c|) / \Sigma|F_o|$ .  $wR_2 = [\Sigma w(F_o^2 - F_c^2)^2 / \Sigma w(F_o^2)^2]^{1/2}$ .  $w = 1 / [\sigma^2(F_o^2) + (ap)^2 + bp]$ , where  $p = [\max(F_o^2, 0) + 2F_c^2] / 3$ .

**Table S2.** Crystallographic data of ANT-Me.<sup>a</sup>

|                                                                  |                                                                                                                           |                                                                                     |
|------------------------------------------------------------------|---------------------------------------------------------------------------------------------------------------------------|-------------------------------------------------------------------------------------|
| Empirical formula                                                | C <sub>17</sub> H <sub>22</sub> B <sub>10</sub>                                                                           | 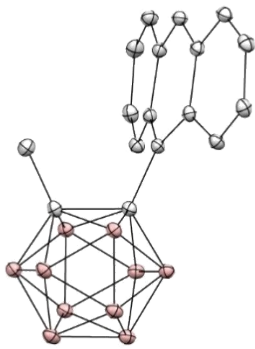 |
| Formula weight                                                   | 334.45                                                                                                                    |                                                                                     |
| Temperature (K)                                                  | 93(2)                                                                                                                     |                                                                                     |
| Wavelength (Å)                                                   | 0.71075                                                                                                                   |                                                                                     |
| Crystal system, space group                                      | Orthorhombic, <i>P</i> 2 <sub>1</sub> 2 <sub>1</sub> 2 <sub>1</sub>                                                       |                                                                                     |
| Unit cell dimensions                                             | <i>a</i> = 7.4049(3)<br><i>b</i> = 10.2673(4)<br><i>c</i> = 23.6399(11)<br>$\alpha$ = 90<br>$\beta$ = 90<br>$\gamma$ = 90 |                                                                                     |
| <i>V</i> (Å <sup>3</sup> )                                       | 1797.30(13)                                                                                                               |                                                                                     |
| <i>Z</i> , calculated density (Mg m <sup>-3</sup> )              | 4, 1.236                                                                                                                  |                                                                                     |
| Absorption coefficient                                           | 0.061                                                                                                                     |                                                                                     |
| <i>F</i> (000)                                                   | 696                                                                                                                       |                                                                                     |
| Crystal size (mm)                                                | 0.60 × 0.50 × 0.50                                                                                                        |                                                                                     |
| $\theta$ range for data collection                               | 3.25–27.42                                                                                                                |                                                                                     |
| Limiting indices                                                 | −9 ≤ <i>h</i> ≤ 9, −12 ≤ <i>k</i> ≤ 13, −30 ≤ <i>l</i> ≤ 30                                                               |                                                                                     |
| Reflections collected (unique)                                   | 17403/4099 [ <i>R</i> (int) = 0.0386]                                                                                     |                                                                                     |
| Completeness to theta = 27.48                                    | 0.997                                                                                                                     |                                                                                     |
| Max. and min. transmission                                       | 0.9700 and 0.9642                                                                                                         |                                                                                     |
| Goodness-of-fit on <i>F</i> <sup>2</sup>                         | 1.036                                                                                                                     |                                                                                     |
| Final <i>R</i> indices [ <i>I</i> > 2σ( <i>I</i> )] <sup>a</sup> | <i>R</i> <sub>1</sub> = 0.0376, <i>wR</i> <sub>2</sub> = 0.0956                                                           |                                                                                     |
| <i>R</i> indices (all data)                                      | <i>R</i> <sub>1</sub> = 0.0399, <i>wR</i> <sub>2</sub> = 0.0970                                                           |                                                                                     |

<sup>a</sup> The structures were solved by direct method (SIR97)<sup>4</sup> and refined by full-matrix least-squares procedures based on *F*<sup>2</sup> (SHELX-97).<sup>5</sup> <sup>b</sup>  $R_1 = \Sigma(|F_0| - |F_c|) / \Sigma|F_0|$ .  $wR_2 = [\Sigma w(F^2_0 - F^2_c)^2 / \Sigma w(F^2_0)^2]^{1/2}$ .  $w = 1 / [\sigma^2(F^2_0) + (ap)^2 + bp]$ , where  $p = [\max(F^2_0, 0) + 2F^2_c] / 3$ .

**Table S3.** Crystallographic data of ANT-TMS.<sup>a</sup>

|                                                                  |                                                                                                                                  |  |
|------------------------------------------------------------------|----------------------------------------------------------------------------------------------------------------------------------|--|
| Empirical formula                                                | C <sub>19</sub> H <sub>28</sub> B <sub>10</sub> Si                                                                               |  |
| Formula weight                                                   | 392.60                                                                                                                           |  |
| Temperature (K)                                                  | 93(2)                                                                                                                            |  |
| Wavelength (Å)                                                   | 0.71075                                                                                                                          |  |
| Crystal system, space group                                      | Monoclinic, <i>P</i> 2 <sub>1</sub> / <i>a</i>                                                                                   |  |
| Unit cell dimensions                                             | <i>a</i> = 10.1119(5)<br><i>b</i> = 16.5353(8)<br><i>c</i> = 12.9542(7)<br>$\alpha$ = 90<br>$\beta$ = 90.332(6)<br>$\gamma$ = 90 |  |
| <i>V</i> (Å <sup>3</sup> )                                       | 2165.95(19)                                                                                                                      |  |
| <i>Z</i> , calculated density (Mg m <sup>-3</sup> )              | 4, 1.204                                                                                                                         |  |
| Absorption coefficient                                           | 0.113                                                                                                                            |  |
| <i>F</i> (000)                                                   | 824                                                                                                                              |  |
| Crystal size (mm)                                                | 0.90 × 0.80 × 0.50                                                                                                               |  |
| $\theta$ range for data collection                               | 3.15–27.48                                                                                                                       |  |
| Limiting indices                                                 | −13 ≤ <i>h</i> ≤ 13, −20 ≤ <i>k</i> ≤ 21, −16 ≤ <i>l</i> ≤ 16                                                                    |  |
| Reflections collected (unique)                                   | 18646/4926 [ <i>R</i> (int) = 0.0592]                                                                                            |  |
| Completeness to theta = 27.47                                    | 0.996                                                                                                                            |  |
| Max. and min. transmission                                       | 0.9456 and 0.9051                                                                                                                |  |
| Goodness-of-fit on <i>F</i> <sup>2</sup>                         | 0.997                                                                                                                            |  |
| Final <i>R</i> indices [ <i>I</i> > 2σ( <i>I</i> )] <sup>a</sup> | <i>R</i> <sub>1</sub> = 0.0456, <i>wR</i> <sub>2</sub> = 0.1147                                                                  |  |
| <i>R</i> indices (all data)                                      | <i>R</i> <sub>1</sub> = 0.0580, <i>wR</i> <sub>2</sub> = 0.1255                                                                  |  |

<sup>a</sup> The structures were solved by direct method (SIR97)<sup>4</sup> and refined by full-matrix least-squares procedures based on *F*<sup>2</sup> (SHELX-97).<sup>5</sup> <sup>b</sup>  $R_1 = \Sigma(|F_0| - |F_c|) / \Sigma|F_0|$ .  $wR_2 = [\Sigma w(F^2_0 - F^2_c)^2 / \Sigma w(F^2_0)^2]^{1/2}$ .  $w = 1 / [\sigma^2(F^2_0) + (ap)^2 + bp]$ , where  $p = [\max(F^2_0, 0) + 2F^2_c] / 3$ .

**Table S4.** Optical and electrochemical properties of the dyads

| Compound       | UV/vis <sup>a</sup>                                                                                       |                                  |                                  | CV <sup>d</sup>                                  |                        |                        |
|----------------|-----------------------------------------------------------------------------------------------------------|----------------------------------|----------------------------------|--------------------------------------------------|------------------------|------------------------|
|                | $\lambda_{\text{abs}}$ (nm) ( $\epsilon$ , $\times 10^{-4} \text{ M}^{-1} \text{ cm}^{-1}$ ) <sup>b</sup> | $\lambda_{\text{abs,edge}}$ (nm) | $E_{\text{g}}$ (eV) <sup>c</sup> | $E_{\text{onset}}^{\text{red}}$ (V) <sup>e</sup> | HOMO (eV) <sup>f</sup> | LUMO (eV) <sup>g</sup> |
| <b>ANT-H</b>   | 267(10.7), 395(0.86)                                                                                      | 433                              | 2.86                             | -1.21                                            | -6.45                  | -3.59                  |
| <b>ANT-Ph</b>  | 271(6.8), 408(0.66)                                                                                       | 463                              | 2.68                             | -1.00                                            | -6.48                  | -3.80                  |
| <b>ANT-Me</b>  | 268(12.5), 403(0.95)                                                                                      | 448                              | 2.77                             | -1.21                                            | -6.36                  | -3.59                  |
| <b>ANT-TMS</b> | 268(8.9), 404(0.73)                                                                                       | 449                              | 2.76                             | -1.10                                            | -6.46                  | -3.70                  |

<sup>a</sup> Measured in THF solution ( $1.0 \times 10^{-5} \text{ M}$ ) at room temperature. <sup>b</sup> Molar extinction coefficient. <sup>c</sup> Band gap energy:  $E_{\text{g}} = 1240 / \lambda_{\text{abs, edge}}$ . <sup>d</sup> CV was carried out in DMF with 0.1 M  $\text{Bu}_4\text{NClO}_4$  as supporting electrolyte. <sup>e</sup> Onset potential of first reduction wave. <sup>f</sup>  $\text{HOMO} = \text{LUMO} - E_{\text{g}}$  (eV). <sup>g</sup> Calculated from the empirical formula,  $\text{LUMO} = -E^{\text{red}} - 4.80$  (eV).<sup>6</sup>

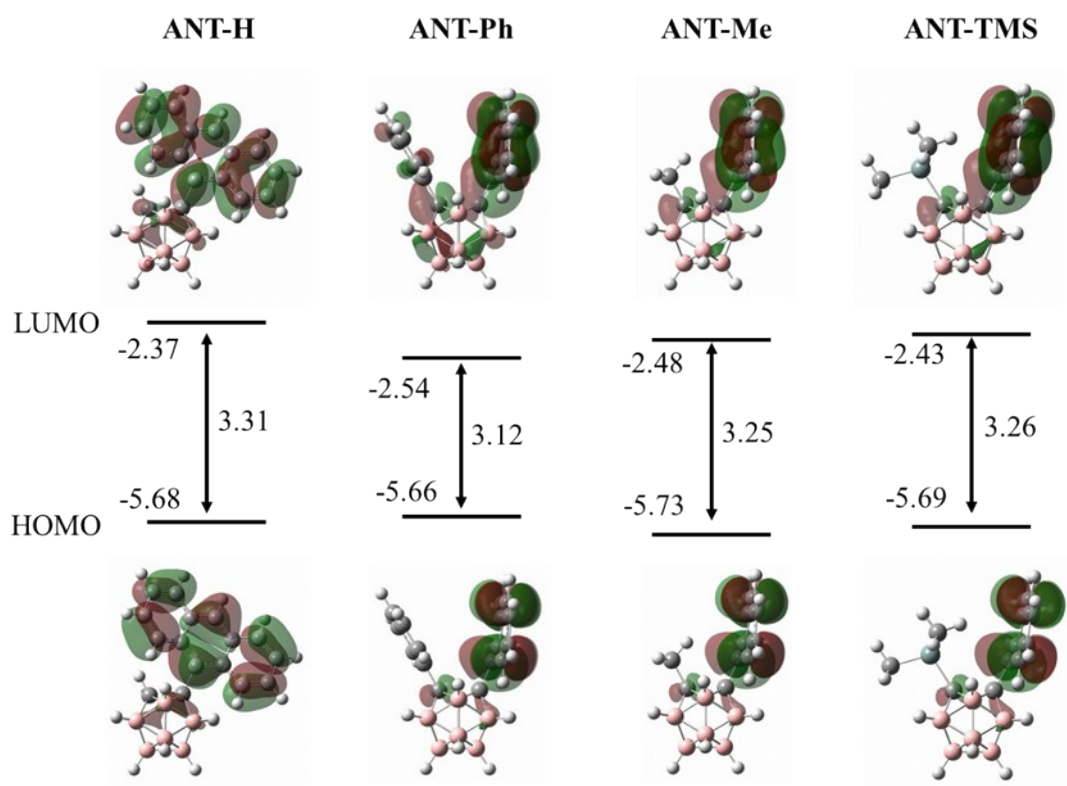

**Figure S1.** Frontier orbitals and their energies (eV) of the dyads.



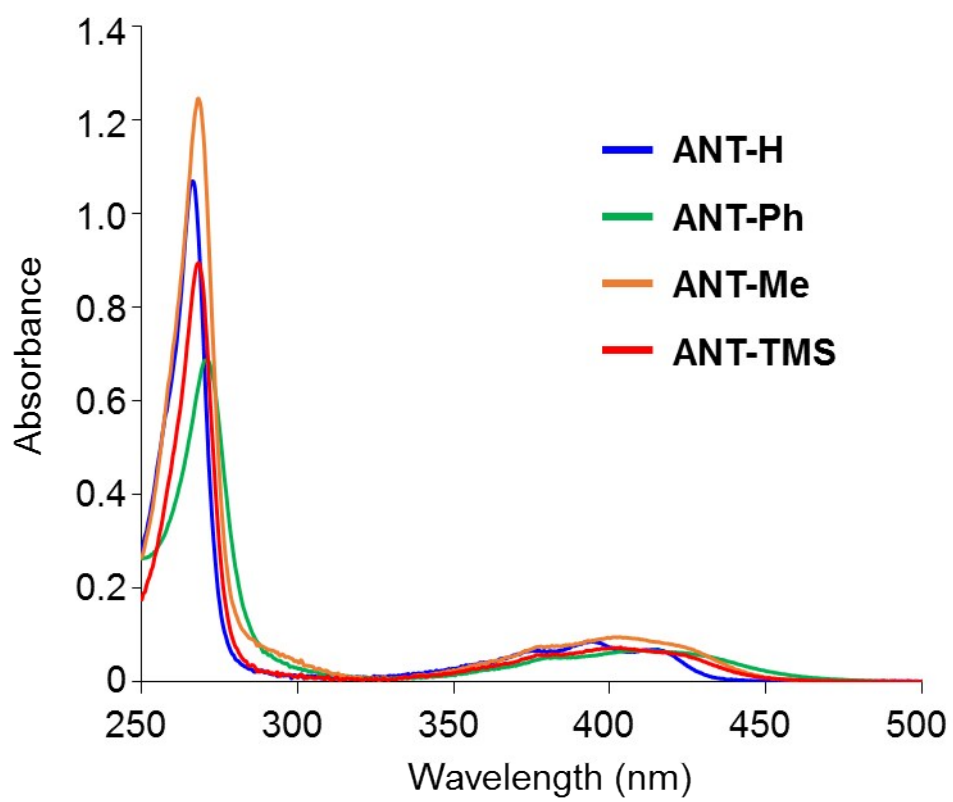

**Figure S2.** UV-vis absorption spectra of the dyads in THF ( $1.0 \times 10^{-5}$  M).

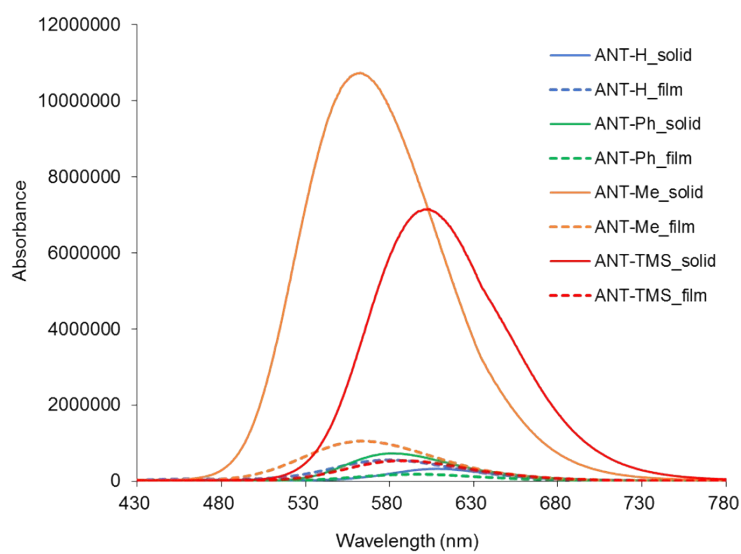

**Figure S3.** PL spectra of the dyads in the crystalline state and PMMA (10 wt%).

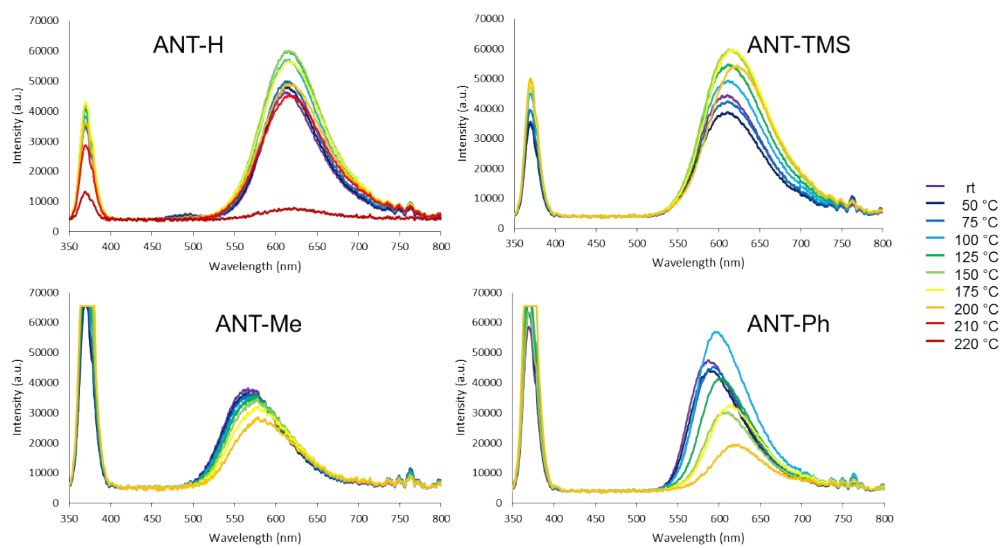

**Figure S4.** Emission spectra of the powder samples of the *o*-carborane dyads during heating.

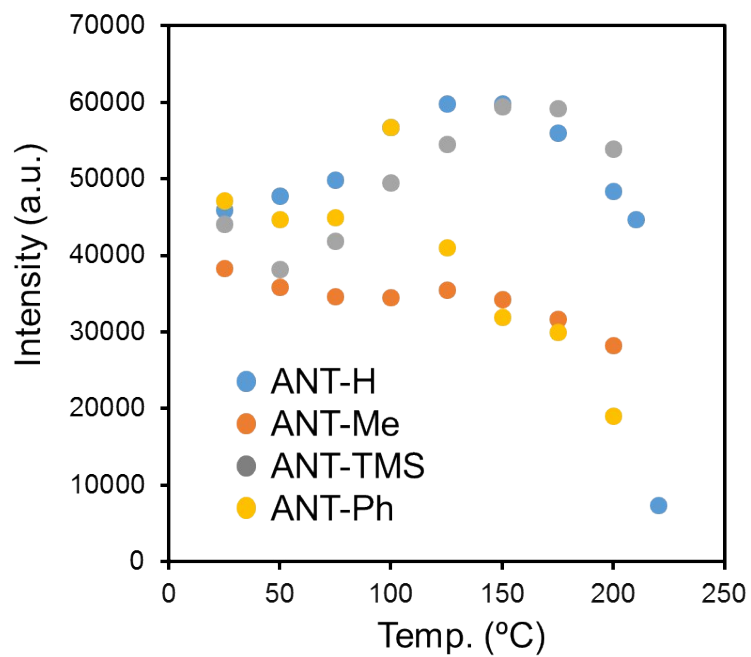

**Figure S5.** Changes in emission intensity of the dyads by heating at the peak top in the emission spectra.

**Table S5.** Thermal decomposition temperatures of the dyads<sup>a</sup>

| dyads          | $T_{d5}$ (°C) |
|----------------|---------------|
| <b>ANT-H</b>   | 200           |
| <b>ANT-Me</b>  | 201           |
| <b>ANT-TMS</b> | 223           |
| <b>ANT-Ph</b>  | 268           |

<sup>a</sup>Determined from the decomposition temperature with 5 wt% weight losses with the thermogravimetric analyses under nitrogen flow (200 mL/min).

## References

1. Finke, A. D.; Elleby, E. C.; Boyd, M. J.; Weissman, H.; Moore, J. S. *J. Org. Chem.* **2009**, *74*, 8897-8900.
2. Gaussian 09, Revision **D.01**, M. J. Frisch, G. W. Trucks, H. B. Schlegel, G. E. Scuseria, M. A. Robb, J. R. Cheeseman, G. Scalmani, V. Barone, B. Mennucci, G. A. Petersson, H. Nakatsuji, M. Caricato, X. Li, H. P. Hratchian, A. F. Izmaylov, J. Bloino, G. Zheng, J. L. Sonnenberg, M. Hada, M. Ehara, K. Toyota, R. Fukuda, J. Hasegawa, M. Ishida, T. Nakajima, Y. Honda, O. Kitao, H. Nakai, T. Vreven, J. A. Montgomery, Jr., J. E. Peralta, F. Ogliaro, M. Bearpark, J. J. Heyd, E. Brothers, K. N. Kudin, V. N. Staroverov, R. Kobayashi, J. Normand, K. Raghavachari, A. Rendell, J. C. Burant, S. S. Iyengar, J. Tomasi, M. Cossi, N. Rega, J. M. Millam, M. Klene, J. E. Knox, J. B. Cross, V. Bakken, C. Adamo, J. Jaramillo, R. Gomperts, R. E. Stratmann, O. Yazyev, A. J. Austin, R. Cammi, C. Pomelli, J. W. Ochterski, R. L. Martin, K. Morokuma, V. G. Zakrzewski, G. A. Voth, P. Salvador, J. J. Dannenberg, S. Dapprich, A. D. Daniels, Ö. Farkas, J. B. Foresman, J. V. Ortiz, J. Cioslowski, and D. J. Fox, Gaussian, Inc., Wallingford CT, 2009.
3. O'boyle, N. M.; Tenderholt, A. L.; Langner, K. M. *J. Comput. Chem.* **2008**, *29*, 839-845.
4. A. Altomare, M. C. Burla, M. Camalli, G. Cascarano, C. Giacovazzo, A. Guagliardi, A. G. Molitani, G. Polidori, R. Spagna, *J. Appl. Cryst.* **1999**, *32*, 115-119.
5. Sheldrick, G. M. *SHELX-97 Programs for Crystal Structure Analysis* (University of Göttingen, Göttingen, Germany, 1997).
6. Chen, C.-P.; Chan, S.-H.; Chao, T.-C.; Ting, C.; Ko, B.-T. *J. Am. Chem. Soc.* **2008**, *130*, 12828-12833.
